# Supplementary material for: The relationship between characteristics of root morphology and grain filling in wheat under drought stress
Source: PeerJ. 2021 Aug 19;9:e12015. doi: 10.7717/peerj.12015 (PMC8380422; doi:10.7717/peerj.12015)
Supplement: Supplemental Information 1 [file peerj-09-12015-s001.xlsx]

## Sheet: PLANT MORPHOLOGY INDEXES
	Plant morphology indexes of wheat
Root length/cm
Treatment	R1	R2	R3	R4	R5	R6
YM13-CC	36.25	36.17	39.56	35.54	38.82	35.35
YM13-DS	32.25	31.82	30.64	30.98	31.62	34.12
YN19-CC	28.18	26.25	30.21	29.38	28.51	27.21
YN19-DS	27.96	25.23	26.85	23.42	26.15	24.38
Plant height/cm
Treatment	R1	R2	R3	R4	R5	R6
YM13-CC	63.32	63.96	64.47	64.42	64.12	62.31
YM13-DS	58.06	61.62	59.39	59.89	61.51	61.13
YN19-CC	58.69	57.55	53.75	55.05	57.05	55.27
YN19-DS	54.33	56.23	52.57	54.37	56.81	53.69
Dry weight of roots/g
Treatment	R1	R2	R3	R4	R5	R6
YM13-CC	3.38	3.46	4.25	3.45	2.76	3.54
YM13-DS	3.13	3.22	3.27	2.32	2.37	2.53
YN19-CC	2.15	2.69	1.78	2.53	2.26	3.32
YN19-DS	1.58	1.67	1.18	1.74	1.29	2.01
Dry weight of aboveground parts/g
Treatment	R1	R2	R3	R4	R5	R6
YM13-CC	9.63	11.2	9.82	9.51	11.66	9.78
YM13-DS	6.38	8.31	6.17	7.73	7.98	5.94
YN19-CC	7.57	6.39	7.16	6.05	7.10	6.85
YN19-DS	3.95	4.18	4.02	3.64	3.59	3.7
Root-shoot ratio
Treatment	R1	R2	R3	R4	R5	R6
YM13-CC	0.35	0.31	0.43	0.36	0.24	0.36
YM13-DS	0.49	0.39	0.53	0.31	0.29	0.43
YN19-CC	0.28	0.42	0.25	0.42	0.32	0.49
YN19-DS	0.41	0.39	0.29	0.48	0.36	0.54

## Sheet: SPIKE TRAITS
		Spike traits of wheat
Spike length/cm
Treatment	R1	R2	R3	R4	R5	R6
YM13-CC	7.21	7.85	8.53	7.82	8.57	8.9
YM13-DS	6.83	6.25	7.22	7.72	7.29	6.81
YN19-CC	8.11	7.02	7.15	7.23	7.44	7.16
YN19-DS	5.81	5.75	6.35	6.54	6.72	6.87
Spike weight/g
Treatment	R1	R2	R3	R4	R5	R6
YM13-CC	2.53	2.29	2.91	2.85	2.16	2.13
YM13-DS	1.42	1.91	1.52	1.69	1.82	1.65
YN19-CC	1.65	1.99	1.56	1.73	1.46	1.65
YN19-DS	1.03	1.13	1.11	1.02	1.12	1.04
Grains number per spike
Treatment	R1	R2	R3	R4	R5	R6
YM13-CC	36	36	37	38	40	39
YM13-DS	32	34	37	35	38	33
YN19-CC	29	31	32	29	33	29
YN19-DS	25	28	27	26	30	27
1000-grains weight/g
Treatment	R1	R2	R3	R4	R5	R6
YM13-CC	32.16	35.28	33.04	36.75	39.71	43.58
YM13-DS	30.32	30.37	28.97	32.56	32.46	38.92
YN19-CC	32.78	34.65	32.79	33.86	34.08	32.58
YN19-DS	32.52	30.56	29.92	33.88	32.23	31.69

## Sheet: CARYOPSIS WEIGHT
			Fresh and dry weight of caryopses
Fresh weight of 100 grains/g							Dry weight of 100 grains/g
Days post anthesis	Treatment	R1	R2	R3			Days post anthesis	Treatment	R1	R2	R3
10DPA	YM13-CC	3.65	3.07	3.98			10DPA	YM13-CC	0.56	0.74	0.89
	YM13-DS	3.41	3.01	3.49				YM13-DS	0.51	0.72	0.91
	YN19-CC	3.49	2.82	3.66				YN19-CC	0.61	0.71	0.92
	YN19-DS	3.22	2.75	3.46				YN19-DS	0.59	0.67	0.88
20DPA	YM13-CC	8.87	9.79	9.98			20DPA	YM13-CC	2.05	2.48	2.91
	YM13-DS	7.96	7.78	7.32				YM13-DS	1.74	1.73	2.34
	YN19-CC	8.72	9.14	9.83				YN19-CC	2.09	2.12	2.46
	YN19-DS	8.01	8.51	9.12				YN19-DS	1.75	1.91	2.37
30DPA	YM13-CC	8.33	8.87	9.12			30DPA	YM13-CC	5.11	4.96	5.41
	YM13-DS	7.67	7.12	6.83				YM13-DS	4.46	4.09	3.72
	YN19-CC	7.52	8.03	8.63				YN19-CC	4.41	4.86	5.31
	YN19-DS	7.25	7.91	6.74				YN19-DS	4.16	4.43	4.93

## Sheet: ENDOSPERM STARCH AND PROTEIN 
Relative area of amyloplast in endosperm cells/%							Relative area of protein body in endosperm cells/%
Days post anthesis	Treatment	R1	R2	R3			Days post anthesis	Treatment	R1	R2	R3
10DPA	YM13-CC	26.45	20.36	27.15			10DPA	YM13-CC	1.53	1.09	0.73
	YM13-DS	15.56	22.74	23.12				YM13-DS	1.95	1.26	0.95
	YN19-CC	19.23	21.38	26.69				YN19-CC	0.93	2.18	1.47
	YN19-DS	23.86	21.06	16.56				YN19-DS	1.05	2.56	1.51
20DPA	YM13-CC	38.89	33.58	42.44			20DPA	YM13-CC	5.38	7.84	8.11
	YM13-DS	30.42	23.12	29.25				YM13-DS	7.24	8.26	10.66
	YN19-CC	28.75	31.18	35.21				YN19-CC	8.56	10.57	12.55
	YN19-DS	29.15	29.42	19.88				YN19-DS	10.12	11.49	13.59
30DPA	YM13-CC	62.87	55.28	56.48			30DPA	YM13-CC	7.54	8.26	11.45
	YM13-DS	52.28	48.21	41.41				YM13-DS	10.54	12.55	14.56
	YN19-CC	56.84	48.21	45.45				YN19-CC	10.55	16.29	15.22
	YN19-DS	37.29	47.24	45.21				YN19-DS	13.46	17.63	17.25
